# Supplementary material for: Mapping hypothalamic development in transgender and cisgender youth
Source: Research Square preprint supplement (doi:10.21203/rs.3.rs-4883317/v1), 2024-09-05
Supplement: Supplementary file 1 [file f60d5ff694c6e912a598396b.docx]

***Supplementary information for the manuscript***

**Mapping hypothalamic development in cis- and transgender youth**

**Supplementary Methods**

**Subject characteristics and assessments**

MRI data of the current study originated from participants of two different projects that had started in 20071–3 and 20094–8 , respectively, and were conducted at the Center of Expertise on Gender Dysphoria, University Medical Center Amsterdam. At the time of data collection, diagnostic criteria for ‘Gender Identity Disorder’, DSM-IV-TR 9 applied. Cisgender participants were recruited via several Dutch secondary schools as well as by inviting friends of the participants with gender incongruence. Exclusion criteria for participation in the study were continuous use of psychotropic medication, any form of psychiatric or neurological disorder, and contraindications for MRI. Informed consent was obtained for all children and adolescents, and their legal guardians, according to the Declaration of Helsinki. Both projects were approved by the Ethics Committee of the VU University Medical Center Amsterdam (METC 2006/292; NL 15404.029.06 and 2010/48; NL 3128.302.910, respectively).

The original, combined sample consisted of 308 participants with a total of 405 MR acquisitions. Data of two participants had to be excluded due to technical errors during segmentation, and two image acquisitions were excluded due to insufficient image quality. The final sample of MR data analyzed consisted of 401 MR images of 306 participants. This sample consisted of 139 cisgender participants (75 birth-assigned females; 7 – 19 years old), of which 37 were scanned twice (with on average 16 months between MRI sessions) and 167 transgender participants (92 birth-assigned females; 7 – 22 years old), of which 75 were treatment-naïve, 59 received puberty-suppressant GnRHa treatment, and 33 received GAH treatment in combination with GnRHa at MRI session 1. Forty-eight transgender participants were scanned at least twice during different treatment stages. There were 10 participants (six trans boys, four trans girls) who were scanned three times; they participated once during one project (before the start of GnRHa treatment), and participated twice in the other project (once when having received GnRHa, and a second time when having received GAH treatment at the time of the MRI session), but due to the small sample size, we did not separately analyze the hypothalamus volumes of these 10 participants.

The subsample of treatment-naïve (cis- or transgender) participants could further be divided into a prepubertal and pubertal group. All supposedly prepubertal children underwent a short physical examination by a pediatric endocrinologist to ascertain their prepubertal status (i.e., Tanner stage 1, Marshall & Tanner, 1969, 1970). As part of the clinical protocol, a pediatric endocrinologist measured Tanner stage of the transgender adolescents on a regular basis, and the measurement closest to the day of the scan was used for analysis. Among cisgender adolescents, pubertal status was measured through self-reported Tanner stage (indicating degree of sexual maturation and genital/breast development ranging from 1-prepubertal to 5-postpubertal) on the day of the MRI session.

Puberty suppression, thus GnRHa treatment, consisted of monthly injections of Decapeptyl-CR® (Ferring, Hoofddorp, the Netherlands). GAH treatment in trans boys consisted of either a testosterone ester mixture (Sustanon 250 mg/mL Merck Sharp & Dohme bv) every 2 weeks or testosterone undecanoate (Nebido, 250 mg/mL, Bayer) every 12 weeks for trans boys. The starting dosage varied with the patient’s age. Until the age of 16.5 years, the starting dosage was 25 mg/m2 body surface area every 2 weeks. When older than 16.5 years the dosage was 75 mg every 2 weeks. Thirty-three trans girls received estradiol either orally (Progynova®, 2 mg/mL, Bayer) every day or subcutaneous estradiol (Meno-Implant®, 20 mg/mL, Organon Nederland BV); see Table 1 for details of the sample and treatment conditions.

At the time of data collection, adolescents who had started GAH treatment continued to receive GnRHa until gonadectomy.

**Apparatus and procedure**

T1-weighted MR images from the participants in the project described by 6 were acquired using a 3-Tesla GE Signa HDxt scanner, and 8-channel head coil, 3D FSPGR sequence, 25 cm2 FOV, TR of 7.8 ms, TE of 3.0 ms, slice thickness of 1 mm, and 176 slices. The MR images from participants in the project described by 3 were acquired with a 3-Tesla Philips Intera scanner, equipped with a 6-channel head coil, using the following acquisition parameters: TR of 9 ms, TE of 3.5 ms, matrix size of 256 × 256, slice thickness of 1mm, and 170 slices. Data analysis was performed with Freesurfer’s “recon-all” function for automatic segmentation ([https://surfer.nmr.mgh.harvard.edu/fswiki/recon-all](about:blank)). Each individual’s resulting output of the “basal forebrain” structure was used as input in further manual segmentations done with the Freeview tool (version 5.3.0, [https://surfer.nmr.mgh.harvard.edu/](about:blank)). Data were anonymized to ensure rater blindness to the individuals’ sex, gender, age, and treatment stage.

**Segmenting the hypothalamus**

The hypothalamus was divided into an anterior, tuberal, and posterior hypothalamus sub-structure, and the region of the BNST area according to previously developed protocols 10,11(Makris et al., 2013; Theiss et al., 2017). Due to the exploratory nature of this study, we focused on the volumes of these three sub-structures plus the total hypothalamus, and did not separately examine the superior and inferior parts of the anterior and tuberal subregions. A detailed segmentation protocol can be found in the Supplementary Information.

hypothalamus. Inter-rater reliability (IRR) was calculated over 9 brains using Intra-Class Correlations (ICCs). Cicchetti (1994) provides commonly-cited cutoff values for ICCs. IRR is poor when ICC < .40, fair when ICC = .40 - .59, good when ICC = .60 - .74, and excellent when ICC = .75 - 1.0 (Cicchetti, 1994). ICCs were excellent for the total hypothalamus (0.827), anterior hypothalamus (0.808), tuberal hypothalamus (0.963), posterior hypothalamus (0.799) and BNST area (0.923).

All segmentations used for the current study were performed by a single rater (DT).

**Statistical analyses**

*Hypothalamus volume*

Analyses were conducted with the Statistical Package for the Social Sciences version 25 (SPSS Inc., Chicago, IL, USA). Because the data were in part longitudinal (with 2 MRI sessions in 85 participants, and 3 sessions in 10 participants) and in part cross-sectional, mixed model analyses were used. The advantage of mixed models is that they can handle missing cases, and equal intervals between follow-up measures are not required 12. Random intercepts were included meaning that the intercept was allowed to vary for each individual, to take into account that some individuals had multiple sessions and some did not. We did not include random effects. Volumes of the total, anterior, tuberal and posterior hypothalamus, and of the BNST area were included as dependent variables.

*Hypothalamic developmental trajectories*

In a first mixed model, we investigated whether children and adolescents with gender incongruence would show different trajectories of hypothalamic development compared with cisgender children and adolescents, and if these effects were sex-specific. Therefore, mean-centered Age (continuous), Sex (2 levels: [birth-assigned] male, [birth-assigned] female), and Gender (2 levels: identifying male (cis- and transgender boys), identifying female (cis- and transgender girls)) were included as fixed factors. Tanner stage at the time of the first scan was included as a covariate of no interest to account for the fact that girls tend to enter puberty at an earlier age than boys 13,14. Adding Tanner stage as covariate resulted in a better model fit, as indicated by lower Akaike information criterion (AIC) values for total hypothalamus and all sub-structures compared to a model that did not include Tanner stage (Table S2). Additionally, we tested whether other than linear age-dependent, e.g., quadratic age trajectories resulted in a better fit: this was the case for the BNST, for which a quadratic relationship of age with volume change resulted in a better fit.

*Pre-treatment group differences & puberty effects*

In a second mixed model, we investigated whether specifically *treatment-naïve* children and adolescents with gender incongruence would have sex-atypical hypothalamic volumes and whether puberty (e.g., endogenous sex hormones) might have affected hypothalamic volumes. Therefore, adolescents who had received GnRHa or GAH treatment at the time of the scan were excluded for this analysis. The factors Sex, Gender, and Condition (2 levels: pre-pubertal, pubertal) were defined.

*Hormone treatment effects on hypothalamic volumes*

In order to investigate the effects of the hormonal interventions on hypothalamus volume, the factors Treatment Status (3 levels: early pubertal/treatment-naïve, GnRHa treatment, GAH treatment), Sex, and Gender were included in a third mixed model. For optimal comparison, transgender participants of the three treatment conditions were age-matched with treatment-naïve cisgender adolescents, defined as young, mid-adolescent, and older adolescent age groups. Table 2 lists number of adolescents and mean ages in each group. Pre-pubertal participants were excluded for this analysis.

For all mixed models, we tested the three-way interactions of Sex, Gender, and Age/Condition/Treatment Status, as well as all possible two-way interactions, and the main effects.

In addition, for a sub-sample of 21 trans boys and 17 trans girls, who had received GnRHa at the first MRI session and had received GAH treatment for about 1 year at session 2 (with on average 20 months between MRI sessions) we had the opportunity to specifically examine the effects of GAH on hypothalamic volume changes during adolescence. A repeated-measures ANOVA was performed, also including 17 cisgender boys and 20 cisgender girls, with on average 15 months between two MRI sessions. Gender and Sex were entered as between-subject factors.

*Intra-cranial volume*

We also investigated potential group differences in total ICV, by applying the same three mixed models and repeated measures ANOVA described above to Freesurfer’s automated segmentation of ICV in order to compare hypothalamic development and development of ICV. We chose to examine ICV rather than total brain volume because ICV better accounts for sex differences and individual differences in head size 15–17. ICV was missing for two pubertal cis boys and for four pubertal cis girls.

**Segmentation protocol of the hypothalamus segments and the Bed Nucleus of the Stria Terminalis (central part)**

1. Freesurfer’s automated segmentation of the basal forebrain was used as a starting point from which to begin manual segmentation of the hypothalamus. First, the superior border of the hypothalamus was identified by drawing the hypothalamic fissure in sagittal view.
2. Next, the hypothalamus was divided into an anterior, tuberal and posterior part. All of the following segmentation steps were performed in coronal view. The anterior hypothalamus constituted all slices on which the anterior commissure (AC) was continuously visible. The posterior hypothalamus included all slices on which the mammillary bodies were visible. The first slice of the tuberal hypothalamus began when the AC was no longer continuous and ended when the mammillary bodies appeared.
3. On those slices on which the AC was visible, the AC constituted the superior border of the hypothalamus rather than the hypothalamic fissure. The inferior border was segmented by manually copying the segmentation automatically provided by Freesurfer, but adjusting it when necessary, especially to ensure that cerebrospinal fluid was excluded.
4. On those slices on which the infundibular stalk was visible, the inferior border was the most inferior part of the optic tracts, whereby the optic tract itself was excluded.
5. The lateral borders of the anterior hypothalamus were defined by drawing a vertical line just lateral to the optic tracts/optic chiasm, excluding these from the segmentation.
6. The lateral borders of the tuberal and posterior hypothalamus were found using the Freeview contour tool, a semi-automatic contour finder which can be used to estimate borders between areas of varying intensity, such as grey or white matter, based upon a threshold value set by the user <https://surfer.nmr.mgh.harvard.edu/fswiki/FreeviewGuide/FreeviewTools/VoxelEdit>). The threshold value was set to 100. This computer-defined contour was always checked visually and adjusted if inaccurate.
7. The anterior and tuberal regions were divided into an inferior and superior part. Their border was defined by drawing a horizontal line from the floor of the basal forebrain through the hypothalamus. In brains with considerable noise, Gaussian smoothing was applied to the contour tool (with the contour value set to 100) in order to smooth the borders of the hypothalamus. The automated contour was adjusted if inaccurate.
8. The area of the BNST was segmented next. First, the coronal slice on which the AC was clearly visible was located. The superior part of the AC was defined as inferior border of the BNST for all slices. Next, the anterior border of the BNST is two slices anterior to the most anterior slice on which the AC is still continuously visible. The superior border of the BNST is the most ventral/inferior part of the caudate body. The posterior border is the slice on which the AC is no longer continuously visible. The medial boundary is found by drawing a line from the lateral borders of the fornix down to the area in which the BNSTc should be located. This line constitutes the medial border of the BNST. Finally, the BNST’s lateral border is the white matter of the internal capsule.

**Supplementary Tables**

**Table S1**. *Results of mixed model with Age, Sex and Gender*

|  | Sex, Gender, and Age | Gender and Age | Sex and Age | Sex and Gender | Age | Sex | Gender |
| --- | --- | --- | --- | --- | --- | --- | --- |
| Total Hyp. | 2.87 (10.7) | -.53 (7.1) | -11.43 (7.7) | 66.86 (37.0) | -9.40 (5.7)*** | 86.47 (25.9)*** | 14.48 (24.5)* |
| Anterior Hyp. | 11.92 (5.1)* | -5.26 (3.4) | -7.29 (3.7) | 54.01 (17.3)** | 4.23 (2.7) | -25.38 (12.1) | -26.98 (11.5) |
| Tuberal Hyp. | -12.93 (9.1) | 4.67 (6.0) | -3.03 (6.6)* | -45.86 (30.9) | -10.23 4.8)*** | 80.99 (21.6)*** | 54.43 (20.5)* |
| Posterior Hyp. | 7.51 (4.6) | -1.81 (3.0) | -3.23 (3.3) | 63.42 (15.5)*** | -2.37 (2.4)* | 27.20 (10.9)** | -15.35 10.3)* |
| BNSTa | .48 (.37) | -.14 (.26) | -.75 (.27)** | 2.47 (5.83) | .59 (.21)** | 8.26 (4.14)** | -3.45 (4.03) |
| ICV | 12.18 (6.49) | 2.13 (4.33) | -6.38 (4.56) | 120.36 (30.73)*** | 8.97 (3.68)*** | 82.23 (21.64)*** | -39.18 (20.47) |

The values in the table represent unstandardized betas, reported in mm3 (except for intra-cranial volume, which is reported in cm3), followed by their standard errors (SE); the intercept is the predicted value of the sample;

*** p <.001; **p<.008; *p <.05

a For the BNST, better model fit was indicated when including non-linear (Age squared) as additional predictor (see Table S2) and figures provided indicate Age2, rather than linear Age effects.

**Table S2.** *Akaike’s information criterion values for the mixed model with Age, Sex and Gender (Table S1)*

| Model description | Hypothalamus volume | AIC |
| --- | --- | --- |
| Agea + Sex + Gender |  |  |
|  | Total Hypothalamus | 5188 |
|  | Anterior hypothalamus | 4593 |
|  | Tuberal hypothalamus | 5064 |
|  | Posterior hypothalamus | 4516 |
|  | BNST | 3535 |
| Agea + Sex + Gender + Tanner stageb |  |  |
|  | Total Hypothalamus | **5052** |
|  | Anterior hypothalamus | **4482** |
|  | Tuberal hypothalamus | **4932** |
|  | Posterior hypothalamus | **4405** |
|  | BNST | 3453 |
| Agea + Sex + Gender + Tanner stageb + Age2 |  |  |
|  | Total Hypothalamus | 5404 |
|  | Anterior hypothalamus | 4484 |
|  | Tuberal hypothalamus | 4932 |
|  | Posterior hypothalamus | 4407 |
|  | BNST | **3441** |

Note. AIC = Akaike’s information criterion. Smaller AIC scores indicate a better model fit.

a = Mean-centered, b = Covariate

**Table S3.** *Results of mixed model with Sex, Gender and Puberty Status (pre-pubertal, pubertal)*

|  | Sex, Gender and Puberty Status | Gender and Puberty Status | Sex and Puberty Status | Sex and Gender | Puberty Status | Sex | Gender |
| --- | --- | --- | --- | --- | --- | --- | --- |
| Total Hyp. | 12.89 (86.8) | -31,63 (61.1) | 11,94 (61.3) | 99.95 (56.4)* | 117.60 (41.4)*** | 74.87 (41.2)*** | 2.21 (37.1) |
| Anterior Hyp. | -67.12 (39.1) | 52.28 (27.5) | -9.15 (27.5)* | 65.67 (25.6) | -1.48 (18.9) | -7.51 (18.7) | -51.55 (16.9) |
| Tuberal Hyp. | 104.66 (76.8) | -100.30 (54.1) | 46.37 (54.2)* | -14.97 (50.0) | 101.52 (36.7)*** | 29.69 (36.5)*** | 73.58 (32.9)* |
| Posterior Hyp. | -25.17 (36.7) | 14.67 (25.9) | -23.71 (25.9)* | 51.87 (23.8)* | 18.20 (17.2) | 50.67 (17.4)*** | -19.76 (15.6) |
| BNST | -6.32 (10.3) | 1.69 (7.2) | -3.00 (7.3) | 11.53 (6.5) | 20.79 (4.7)*** | -4.01 (4.8) | -2.05 (4.3) |
| ICV | -190.40 (48.03)*** | 96.13 (33.82) | 119.79 (33.57) | 199.43 (38.88)** | -125.27 (32.48)*** | 14.50 (27.38)*** | -73.60 (26.26) |

Pre-puberty was defined as reference category. The values in the table represent unstandardized betas, reported in mm3 (except for intra-cranial volume, which is reported in cm3), followed by their standard errors (SE); the intercept is the predicted value of the sample; *** p <.001; **p<.008; *p <.05

**Table S4.** Subject characteristics of age-matched groups included for the third mixed model analysis

| **Group** | | **N** | **Mean Age (*SD*)** | ***F* (df)** | ***p*** |
| --- | --- | --- | --- | --- | --- |
| *Early adolescence/treatment naïve* | | *76* | *13.38 (2.30)* | *.619* (3, 72) | *.605* |
|  | Cisgender boys | 16 | 13.17 (1.08) |  |  |
|  | Cisgender girls | 15 | 12.89 (0.93) |  |  |
|  | Transgender boys | 26 | 13.84 (2.96) |  |  |
|  | Transgender girls | 19 | 13.30 (2.76) |  |  |
| *Mid-adolescence/GnRHa* | | *126* | *15.83 (.99)* | *3.154* (3, 122) | *.027* |
|  | Cisgender boys | 25 | 15.95 (0.54) |  |  |
|  | Cisgender girls | 31 | 15.98 (1.03) |  |  |
|  | **Transgender boys** | **37** | **16.02 (1.16)** |  | ***.037*** |
|  | **Transgender girls** | **33** | **15.39 (0.93)** |  |  |
| *Late adolescence/GnRHa+GAH* | | *118* | *17.70 (1.36)* | *2.981* (3, 114) | *.034* |
|  | **Cisgender boys** | **19** | **17.14 (0.64)** |  | ***.044*** |
|  | Cisgender girls | 29 | 17.41 (0.75) |  |  |
|  | **Transgender boys** | **42** | **18.11 (1.43)** |  |  |
|  | Transgender girls | 28⸶ | 17.77 (1.86) |  |  |

*Note*. ⸶= age was missing for 1 individual. Trans and cis adolescents were age-matched so that trans individuals at the different stages of hormone treatment could be compared to cis individuals of the same age. Three one-way ANOVAs with Tukey post-hoc tests were performed to test for group differences at each stage of hormone treatment. Groups in bold indicate significant differences in age between those groups. There were no significant differences in age between trans and cis adolescents of the same sex assigned at birth at any stage of hormone treatment. Early adolescence is the period in which trans boys and trans girls did not receive any medication. Mid-adolescence is the period in which trans boys and trans girls received puberty-suppressant medication (GnRHa). In late adolescence, trans boys and trans girls received gender-affirming hormone treatment in addition to puberty-suppressors (GnRHa + GAH). Cis boys and cis girls did not receive GnRHa and/or GAH. GnRHa = gonadotropin releasing hormone analogues, GAH = gender-affirming hormones.

**Table S5.** Results of *mixed model with Sex, Gender and Treatment Status (pubertal, GnRHa, GAH)*

|  | | Sex, Gender and Treatment Status | Gender and Treatment Status | Sex and Treatment Status | Sex and Gender | Treatment Status | Sex | Gender | |
| --- | --- | --- | --- | --- | --- | --- | --- | --- | --- |
| Total Hyp. | 77.13 (85.6)* | | -68.01 (58.7) | -78.78 (61.2) | 84.67 (70.7)* | 119.85 (48.3)*** | 117.39 (51.8)*** | | 46.60 (49.1)** |
| Anterior Hyp. | 64.51 (42.0) | | -25.18 (28.8) | -72.13 (30.1)* | 22.30 (34.4)** | 45.51 (23.4) | 37.03 (25.3) | | -26.84 (23.9) |
| Tuberal Hyp. | 39.23 (71.6) | | -74.99 (49.2)* | -2.34 (51.3) | -48.14 (58.8) | 87.80 (40.0)*** | 62.79 (43.1)* | | 120.70 (40.7)** |
| Posterior Hyp. | -18.80 (39.2) | | 27.42 (26.9) | -6.36 (28.1) | 106.29 (31.9)*** | 14.51 (21.6) | 19.84 (23.5)*** | | -45.29 (22.1) |
| BNST | -4.70 (10.4) | | -18.81 (7.2)*** | 2.04 (7.5) | 11.55 (8.5) | 9.79 (5.8)** | 1.10 (6.3)** | | 4.06 (5.9) |
| ICV | 92.75 (59.75)*** | | -.62 (41.43)*** | -49.21 (41.66) | 65.26 (53.20)** | -4.95 (40.38)*** | 115.40 (38.64)*** | | -70.81 (37.54) |

The values in the table represent unstandardized betas, reported in mm3, followed by their standard errors (SE); The intercept is the predicted value of the sample;

*** p <.001; **p<.008; *p <.05

**Table S6.** Results of *the repeated measures analysis of hypothalamus volumes pre- (T1) and 1-year on GAH treatment (T2)*

| Predictor | Volume | *F(1,71)* | *p* | Post-hoc pair-wise comparisons |
| --- | --- | --- | --- | --- |
| **Within-subjects effects** | |  |  |  |
| Treatment Status |  |  |  |  |
|  | Total Hyp. | 25.5 | <.001*** | T1 > T2 |
|  | Anterior Hyp. | 2.9 | .093 |  |
|  | Tuberal Hyp. | 38.8 | <.001*** | T1 > T2 |
|  | Posterior Hyp. | .4 | .536 |  |
|  | BNST | 11.7 | .001*** | T1 < T2 |
|  | ICV | 72.6 | <.001*** | T1 < T2 |
| Treatment Status X Gender | | | | |
|  | Total Hyp. | 7.7 | .194 |  |
|  | Anterior Hyp. | 4.0 | .049* |  |
|  | Tuberal Hyp. | 5.6 | .020* |  |
|  | Posterior Hyp. | .2 | .654 |  |
|  | BNST | 12.9 | <.001*** | Sig. increase in identifying M, but not in identifying F |
|  | ICV | 17.1 | <.001*** | Sig. increase in identifying M, but not in identifying F |
| Treatment Status X Sex | | | | |
|  | Total Hyp. | .1 | .756 |  |
|  | Anterior Hyp. | 1.0 | .313 |  |
|  | Tuberal Hyp. | .3 | .560 |  |
|  | Posterior Hyp. | 1.8 | .189 |  |
|  | BNST | .0 | .980 |  |
|  | ICV | .3 | .538 |  |
| Treatment Status X Gender X Sex | | | | |
|  | Total Hyp. | 10.0 | .002** | Sig. Decrease in Cis M and Cis F, but not in Trans M and Trans F |
|  | Anterior Hyp. | .8 | .369 |  |
|  | Tuberal Hyp. | 1.7 | .193 |  |
|  | Posterior Hyp. | 5.7 | .020* |  |
|  | BNST | .0 | 1.000 |  |
|  | ICV | 16.0 | <.001*** | Sig. Increase in Cis M and Trans M, but not in Cis F and Trans F |
| **Between-subject effects** | |  |  |  |
| Gender |  |  |  |  |
|  | Total Hyp. | .3 | .617 |  |
|  | Anterior Hyp. | .5 | .496 |  |
|  | Tuberal Hyp. | .4 | .530 |  |
|  | Posterior Hyp. | .5 | .502 |  |
|  | BNST | 6.0 | .017* |  |
|  | ICV | .1 | .797 |  |
| Seks (assigned at birth) |  |  |  |  |
|  | Total Hyp. | 5.0 | .029* |  |
|  | Anterior Hyp. | .6 | .451 |  |
|  | Tuberal Hyp. | .7 | .398 |  |
|  | Posterior Hyp. | 13.0 | <.001*** | M > F |
|  | BNST | 8.3 | .005** | M > F |
|  | ICV | 15.0 | <.001*** | M > F |
| Gender X Sex |  |  |  |  |
|  | Total Hyp. | 1.4 | .250 |  |
|  | Anterior Hyp. | .1 | .744 |  |
|  | Tuberal Hyp. | .4 | .537 |  |
|  | Posterior Hyp. | .7 | .407 |  |
|  | BNST | 3.0 | .089 |  |
|  | ICV | .7 | .405 |  |

*** p <.001; **p<.008; *p <.05; M=male, F=female; cisgender participants were treatment-naïve at both T1 and T2.
